# Supplementary material
Source: ML conference proceedings conference paper supplement (https://www.ecva.net/papers/eccv_2020/papers_ECCV/html/123720103_ECCV_2020_paper.php)
Supplement: Supplementary file 2 [file 123720103-supp.zip]

Archive with 3 entries (3 files):
- 5635_supp/All_at_once_supp.pdf
- 5635_supp/Compare_with_SOTA.mp4
- 5635_supp/Temporal_consistency_60_to_1920fps.mp4
